# Supplementary material
Source: publisher figshare collection journal article supplement (https://karger.figshare.com/ndownloader/files/30997984)
Supplement: Supplementary file 1 [file 30997984]

**Table S2.** Correlation of grade of stenosis with the MRC dyspnoea score and the spirometric indices in patients with relapse

|  | Grade of stenosis (%) | |
| --- | --- | --- |
| r+ | P |
| FVC (l) | -0.23 | 0.056 |
| FEV1 (l) | -0.40 | **0.001** |
| FEV1/FVC (%) | -0.13 | 0.294 |
| FEF25-75% (l/sec) | -0.36 | **0.002** |
| FEF75% (l/sec) | 0.06 | 0.614 |
| FEF50% (l/sec) | -0.43 | **<0.001** |
| FEF25% (l/sec) | -0.55 | **<0.001** |
| PEF (l/sec) | -0.63 | **<0.001** |
| |FIVC| (l) | -0.23 | 0.067 |
| |FIV1| (l) | -0.31 | **0.038** |
| |FIV1|/|FIVC| (%) | -0.34 | **0.024** |
| FEV1 (ml)/PEF (l/min) | 0.61 | **<0.001** |
| FEF50/|FIF50| | -0.04 | 0.768 |
| FEV1/|FIV1| | 0.14 | 0.368 |
| |PIF| | -0.44 | **0.003** |
| PEF/|PIF| | -0.36 | **<0.001** |
| TPF | -0.58 | **<0.001** |
| MRC dyspnoea score (1-5) | 0.58 | **<0.001** |

FVC: Forced Vital Capacity, FEV1: Forced Expiratory Volume in 1 second, FEF25-75%: Mean Forced Expiratory Flow between 25% and 75% of FVC, FEF75%: Forced Expiratory Flow when 75% of FVC has been expired, FEF50%: Forced Expiratory Flow when 50% of FVC has been expired, FEF25%: Forced Expiratory Flow when 25% of FVC has been expired, PEF: Peak Expiratory Flow, FIVC: Forced Inspiratory Vital Capacity, FIV1: Forced Inspiratory Volume in 1 second (value of FIV1 available in 138 out of the 198 spirometries analyzed), FEF50/|FIF50|: Forced Expiratory Flow/|Forced Inspiratory Flow| at 50% of FVC, PIF: Peak Inspiratory Flow, TPF: Total Peak Flow (defined as the sum of PEF and |PIF|, TPF=PEF+|PIF|), MRC: Medical Research Council

+Spearman’s correlation coefficient
